# Supplementary material
Source: publisher figshare collection journal article supplement (https://karger.figshare.com/ndownloader/files/23742392)
Supplement: Supplementary file 1 [file 23742392]

## SUPPLEMENT 2

Supplement 2: The original published references for the regression equations that were compared in the present study. A – females, B – males.

| A                              |                                          |                                                                             |                                                                                                                                                      |                                            |      |                                                 |
|--------------------------------|------------------------------------------|-----------------------------------------------------------------------------|------------------------------------------------------------------------------------------------------------------------------------------------------|--------------------------------------------|------|-------------------------------------------------|
| FEMALES                        |                                          |                                                                             |                                                                                                                                                      |                                            |      |                                                 |
| Equation (or set of equations) | Equation type (D -direct, ID - indirect) | Author(s)                                                                   | Study title                                                                                                                                          | Publication                                | Year | Author(s) of 2 <sup>nd</sup> indirect equation* |
| F 1                            | D                                        | Edwards, Whyte                                                              | The simple measurement of obesity                                                                                                                    | Clin Sci                                   | 1962 | /                                               |
| F 2                            | D                                        | Edwards, Whyte                                                              | The simple measurement of obesity                                                                                                                    | Clin Sci                                   | 1962 | /                                               |
| F 3                            | D                                        | Levitt, Heymsfield, Pierson, Shapses, Kral                                  | Physiological models of body composition and human obesity                                                                                           | Nutr Metab (Lond)                          | 2007 | /                                               |
| F 4                            | ID                                       | Katch, McArdle                                                              | Prediction of body density from simple anthropometric measurements in college-age men and women                                                      | Hum Biol                                   | 1973 | B                                               |
| F 5                            | D                                        | Al-Gindan, Hankey, Govan, Gallagher, Heymsfield, Lean                       | Derivation and validation of simple anthropometric equations to predict adipose front thigh mass and total fat mass with MRI as the reference method | British Journal of Nutrition               | 2015 | /                                               |
| F 6                            | ID                                       | Katch, McArdle                                                              | Prediction of body density from simple anthropometric measurements in college-age men and women                                                      | Hum Biol                                   | 1973 | S                                               |
| F 7                            | D                                        | Al-Gindan, Hankey, Govan, Gallagher, Heymsfield, Lean                       | Derivation and validation of simple anthropometric equations to predict adipose front thigh mass and total fat mass with MRI as the reference method | British Journal of Nutrition               | 2015 | /                                               |
| F 8                            | ID                                       | Withers, Norton, Craig, Hartland, Venables                                  | The relative body fat and anthropometric prediction of body density of South Australian females aged 17-35 years                                     | Eur J Appl Physiol Occup Physiol           | 1987 | B                                               |
| F 9                            | ID                                       | Withers, Norton, Craig, Hartland, Venables                                  | The relative body fat and anthropometric prediction of body density of South Australian females aged 17-35 years                                     | Eur J Appl Physiol Occup Physiol           | 1987 | B                                               |
| F 10                           | ID                                       | Withers, Norton, Craig, Hartland, Venables                                  | The relative body fat and anthropometric prediction of body density of South Australian females aged 17-35 years                                     | Eur J Appl Physiol Occup Physiol           | 1987 | S                                               |
| F 11                           | ID                                       | Withers, Norton, Craig, Hartland, Venables                                  | The relative body fat and anthropometric prediction of body density of South Australian females aged 17-35 years                                     | Eur J Appl Physiol Occup Physiol           | 1987 | S                                               |
| F 12                           | ID                                       | Withers, Norton, Craig, Hartland, Venables                                  | The relative body fat and anthropometric prediction of body density of South Australian females aged 17-35 years                                     | Eur J Appl Physiol Occup Physiol           | 1987 | B                                               |
| F 13                           | ID                                       | Withers, Norton, Craig, Hartland, Venables                                  | The relative body fat and anthropometric prediction of body density of South Australian females aged 17-35 years                                     | Eur J Appl Physiol Occup Physiol           | 1987 | B                                               |
| F 14                           | ID                                       | Sloan                                                                       | Estimation of body fat in young women                                                                                                                | Journal of Applied Physiology              | 1962 | B                                               |
| F 15                           | D                                        | Slaughter, Lohman, Boileau, Horswill, Stillman, van Loan, Bembien           | Skinfold equations for estimation of body fatness in children and youth                                                                              | Human Biology                              | 1988 | /                                               |
| F 16                           | ID                                       | Pollock, Laughridge, Coleman, Linnerud, Jackson                             | Prediction of body density in young and middle-aged women                                                                                            | J Appl Physiol                             | 1975 | B                                               |
| F 17                           | D                                        | Jackson, Stanforth, Gagnon, Rankinen, Leon, Rao, Skinner, Bouchard, Wilmore | The effect of sex, age and race on estimating percentage body fat from body mass index: The Heritage Family Study                                    | International Journal of Obesity           | 2002 | /                                               |
| F 18                           | ID                                       | Withers, Norton, Craig, Hartland, Venables                                  | The relative body fat and anthropometric prediction of body density of South Australian females aged 17-35 years                                     | Eur J Appl Physiol Occup Physiol           | 1987 | S                                               |
| F 19                           | ID                                       | Jackson, Pollock, Ward                                                      | Generalized equations for predicting body density of women                                                                                           | Med Sci Sports Exer                        | 1980 | B                                               |
| F 20                           | ID                                       | Withers, Norton, Craig, Hartland, Venables                                  | The relative body fat and anthropometric prediction of body density of South Australian females aged 17-35 years                                     | Eur J Appl Physiol Occup Physiol           | 1987 | S                                               |
| F 21                           | ID                                       | Withers, Norton, Craig, Hartland, Venables                                  | The relative body fat and anthropometric prediction of body density of South Australian females aged 17-35 years                                     | Eur J Appl Physiol Occup Physiol           | 1987 | B                                               |
| F 22                           | ID                                       | Katch, Michael                                                              | Prediction of body density from skin-fold and girth measurements of college females                                                                  | J Appl Physiol                             | 1963 | B                                               |
| F 23                           | ID                                       | Sloan                                                                       | Estimation of body fat in young women                                                                                                                | Journal of Applied Physiology              | 1962 | S                                               |
| F 24                           | ID                                       | Pollock, Laughridge, Coleman, Linnerud, Jackson                             | Prediction of body density in young and middle-aged women                                                                                            | J Appl Physiol                             | 1975 | S                                               |
| F 25                           | ID                                       | Jackson, Pollock, Ward                                                      | Generalized equations for predicting body density of women                                                                                           | Med Sci Sports Exer                        | 1980 | S                                               |
| F 26                           | ID                                       | Jackson, Pollock, Ward                                                      | Generalized equations for predicting body density of women                                                                                           | Med Sci Sports Exer                        | 1980 | B                                               |
| F 27                           | ID                                       | Jackson, Pollock, Ward                                                      | Generalized equations for predicting body density of women                                                                                           | Med Sci Sports Exer                        | 1980 | B                                               |
| F 28                           | ID                                       | Withers, Norton, Craig, Hartland, Venables                                  | The relative body fat and anthropometric prediction of body density of South Australian females aged 17-35 years                                     | Eur J Appl Physiol Occup Physiol           | 1987 | S                                               |
| F 29                           | D                                        | Lean, Han, Deurenberg                                                       | Predicting body composition by densitometry from simple anthropometric measurements                                                                  | The American Journal of Clinical Nutrition | 1996 | /                                               |
| F 30                           | D                                        | Slaughter, Lohman, Boileau, Horswill, Stillman, van Loan, Bembien           | Skinfold equations for estimation of body fatness in children and youth                                                                              | Human Biology                              | 1988 | /                                               |
| F 31                           | ID                                       | Katch, Michael                                                              | Prediction of body density from skin-fold and girth measurements of college females                                                                  | J Appl Physiol                             | 1963 | S                                               |
| F 32                           | ID                                       | Jackson, Pollock, Ward                                                      | Generalized equations for predicting body density of women                                                                                           | Med Sci Sports Exer                        | 1980 | B                                               |
| F 33                           | ID                                       | Lean, Han, Deurenberg                                                       | Predicting body composition by densitometry from simple anthropometric measurements                                                                  | The American Journal of Clinical Nutrition | 1996 | B                                               |
| F 34                           | ID                                       | Lean, Han, Deurenberg                                                       | Predicting body composition by densitometry from simple anthropometric measurements                                                                  | The American Journal of Clinical Nutrition | 1996 | B                                               |
| F 35                           | ID                                       | Jackson, Pollock, Ward                                                      | Generalized equations for predicting body density of women                                                                                           | Med Sci Sports Exer                        | 1980 | S                                               |
| F 36                           | ID                                       | Jackson, Pollock, Ward                                                      | Generalized equations for predicting body density of women                                                                                           | Med Sci Sports Exer                        | 1980 | B                                               |
| F 37                           | ID                                       | Jackson, Pollock, Ward                                                      | Generalized equations for predicting body density of women                                                                                           | Med Sci Sports Exer                        | 1980 | S                                               |
| F 38                           | ID                                       | Pollock, Laughridge, Coleman, Linnerud, Jackson                             | Prediction of body density in young and middle-aged women                                                                                            | J Appl Physiol                             | 1975 | B                                               |
| F 39                           | ID                                       | Jackson, Pollock, Ward                                                      | Generalized equations for predicting body density of women                                                                                           | Med Sci Sports Exer                        | 1980 | S                                               |
| F 40                           | ID                                       | Lean, Han, Deurenberg                                                       | Predicting body composition by densitometry from simple anthropometric measurements                                                                  | The American Journal of Clinical Nutrition | 1996 | B                                               |
| F 41                           | ID                                       | Lean, Han, Deurenberg                                                       | Predicting body composition by densitometry from simple anthropometric measurements                                                                  | The American Journal of Clinical Nutrition | 1996 | S                                               |

|      |    |                                                                                                                            |                                                                                                                                                  |                                            |      |   |
|------|----|----------------------------------------------------------------------------------------------------------------------------|--------------------------------------------------------------------------------------------------------------------------------------------------|--------------------------------------------|------|---|
| F 42 | D  | Lean, Han, Deurenberg                                                                                                      | Predicting body composition by densitometry from simple anthropometric measurements                                                              | The American Journal of Clinical Nutrition | 1996 | / |
| F 43 | ID | Lean, Han, Deurenberg                                                                                                      | Predicting body composition by densitometry from simple anthropometric measurements                                                              | The American Journal of Clinical Nutrition | 1996 | S |
| F 44 | ID | Wilmore, Behnke                                                                                                            | An anthropometric estimation of body density and lean body weight in young women                                                                 | The American Journal of Clinical Nutrition | 1970 | B |
| F 45 | ID | Jackson, Pollock, Ward                                                                                                     | Generalized equations for predicting body density of women                                                                                       | Med Sci Sports Exer                        | 1980 | S |
| F 46 | ID | Jackson, Pollock, Ward                                                                                                     | Generalized equations for predicting body density of women                                                                                       | Med Sci Sports Exer                        | 1980 | B |
| F 47 | ID | Pollock, Laughridge, Coleman, Linnerud, Jackson                                                                            | Prediction of body density in young and middle-aged women                                                                                        | J Appl Physiol                             | 1975 | S |
| F 48 | D  | Lean, Han, Deurenberg                                                                                                      | Predicting body composition by densitometry from simple anthropometric measurements                                                              | The American Journal of Clinical Nutrition | 1996 | / |
| F 49 | ID | Lean, Han, Deurenberg                                                                                                      | Predicting body composition by densitometry from simple anthropometric measurements                                                              | The American Journal of Clinical Nutrition | 1996 | B |
| F 50 | D  | Deurenberg, Weststrate, Seidell                                                                                            | Body mass index as a measure of body fatness: age- and sex- specific prediction formulas                                                         | British Journal of Nutrition               | 1991 | / |
| F 51 | ID | Lean, Han, Deurenberg                                                                                                      | Predicting body composition by densitometry from simple anthropometric measurements                                                              | The American Journal of Clinical Nutrition | 1996 | S |
| F 52 | ID | Wilmore, Behnke                                                                                                            | An anthropometric estimation of body density and lean body weight in young women                                                                 | The American Journal of Clinical Nutrition | 1970 | S |
| F 53 | ID | Jackson, Pollock, Ward                                                                                                     | Generalized equations for predicting body density of women                                                                                       | Med Sci Sports Exer                        | 1980 | S |
| F 54 | ID | Lean, Han, Deurenberg                                                                                                      | Predicting body composition by densitometry from simple anthropometric measurements                                                              | The American Journal of Clinical Nutrition | 1996 | B |
| F 55 | ID | Lean, Han, Deurenberg                                                                                                      | Predicting body composition by densitometry from simple anthropometric measurements                                                              | The American Journal of Clinical Nutrition | 1996 | S |
| F 56 | D  | Lean, Han, Deurenberg                                                                                                      | Predicting body composition by densitometry from simple anthropometric measurements                                                              | The American Journal of Clinical Nutrition | 1996 | / |
| F 57 | ID | Pollock, Laughridge, Coleman, Linnerud, Jackson                                                                            | Prediction of body density in young and middle-aged women                                                                                        | J Appl Physiol                             | 1975 | B |
| F 58 | ID | Lean, Han, Deurenberg                                                                                                      | Predicting body composition by densitometry from simple anthropometric measurements                                                              | The American Journal of Clinical Nutrition | 1996 | B |
| F 59 | D  | Lean, Han, Deurenberg                                                                                                      | Predicting body composition by densitometry from simple anthropometric measurements                                                              | The American Journal of Clinical Nutrition | 1996 | / |
| F 60 | ID | Lean, Han, Deurenberg                                                                                                      | Predicting body composition by densitometry from simple anthropometric measurements                                                              | The American Journal of Clinical Nutrition | 1996 | S |
| F 61 | D  | Gómez-Ambrosi, Silva, Galofré, Escalada, Santos, Millán, Vila, Ibañez, Gil, Valentí, Rotellar, Ramírez, Salvador, Frühbeck | Body mass index classification misses subjects with increased cardiometabolic risk factors related to elevated adiposity                         | Int J Obes (Lond)                          | 2011 | / |
| F 62 | ID | Lean, Han, Deurenberg                                                                                                      | Predicting body composition by densitometry from simple anthropometric measurements                                                              | The American Journal of Clinical Nutrition | 1996 | B |
| F 63 | ID | Pollock, Laughridge, Coleman, Linnerud, Jackson                                                                            | Prediction of body density in young and middle-aged women                                                                                        | J Appl Physiol                             | 1975 | S |
| F 64 | ID | Lean, Han, Deurenberg                                                                                                      | Predicting body composition by densitometry from simple anthropometric measurements                                                              | The American Journal of Clinical Nutrition | 1996 | B |
| F 65 | ID | Durnin, Womersly                                                                                                           | Body fat assessed from total body density and its estimation from skinfold thickness: measurements on 481 men and women aged from 16 to 72 years | British Journal of Nutrition               | 1974 | B |
| F 66 | ID | Lean, Han, Deurenberg                                                                                                      | Predicting body composition by densitometry from simple anthropometric measurements                                                              | The American Journal of Clinical Nutrition | 1996 | S |
| F 67 | D  | Lean, Han, Deurenberg                                                                                                      | Predicting body composition by densitometry from simple anthropometric measurements                                                              | The American Journal of Clinical Nutrition | 1996 | / |
| F 68 | D  | Lean, Han, Deurenberg                                                                                                      | Predicting body composition by densitometry from simple anthropometric measurements                                                              | The American Journal of Clinical Nutrition | 1996 | / |
| F 69 | ID | Lean, Han, Deurenberg                                                                                                      | Predicting body composition by densitometry from simple anthropometric measurements                                                              | The American Journal of Clinical Nutrition | 1996 | S |
| F 70 | D  | Lean, Han, Deurenberg                                                                                                      | Predicting body composition by densitometry from simple anthropometric measurements                                                              | The American Journal of Clinical Nutrition | 1996 | / |
| F 71 | ID | Lean, Han, Deurenberg                                                                                                      | Predicting body composition by densitometry from simple anthropometric measurements                                                              | The American Journal of Clinical Nutrition | 1996 | S |
| F 72 | ID | Durnin, Womersly                                                                                                           | Body fat assessed from total body density and its estimation from skinfold thickness: measurements on 481 men and women aged from 16 to 72 years | British Journal of Nutrition               | 1974 | S |
| F 73 | D  | Ramirez-Zea, Torun, Martorell, Stei                                                                                        | Anthropometric predictors of body fat as measured by hydrostatic weighing in Guatemalan adults                                                   | Am J Clin Nutr                             | 2006 | / |
| F 74 | ID | Durnin, Rahaman                                                                                                            | The assessment of the amount of fat in the human body from measurements of skinfold thickness                                                    | British Journal of Nutrition               | 1967 | B |
| F 75 | D  | Ramirez-Zea, Torun, Martorell, Stei                                                                                        | Anthropometric predictors of body fat as measured by hydrostatic weighing in Guatemalan adults                                                   | Am J Clin Nutr                             | 2006 | / |
| F 76 | ID | Durnin, Rahaman                                                                                                            | The assessment of the amount of fat in the human body from measurements of skinfold thickness                                                    | British Journal of Nutrition               | 1967 | S |
| F 77 | D  | Edwards, Whyte                                                                                                             | The simple measurement of obesity                                                                                                                | Clin Sci                                   | 1962 | / |
| F 78 | D  | Peterson, Czerwinski, Siervogel                                                                                            | Development and validation of skinfold-thickness prediction equations with a 4-compartment model                                                 | The American Journal of Clinical Nutrition | 2003 | / |

## B

| MALES                          |                                           |                                                                   |                                                                                                           |                                             |      |                                                 |
|--------------------------------|-------------------------------------------|-------------------------------------------------------------------|-----------------------------------------------------------------------------------------------------------|---------------------------------------------|------|-------------------------------------------------|
| Equation (or set of equations) | Equation type (D - direct, ID - indirect) | Author(s) of direct or 1 <sup>st</sup> indirect equation          | Study title                                                                                               | Publication                                 | Year | Author(s) of 2 <sup>nd</sup> indirect equation* |
| M 1                            | D                                         | Edwards, Whyte                                                    | The simple measurement of obesity                                                                         | Clin Sci                                    | 1962 | /                                               |
| M 2                            | ID                                        | Brožek, Keys                                                      | The evaluation of leanness-fatness in man: norm and interrelationships                                    | British Journal of Nutrition                | 1951 | S                                               |
| M 3                            | ID                                        | Brožek, Keys                                                      | The evaluation of leanness-fatness in man: norm and interrelationships                                    | British Journal of Nutrition                | 1951 | S                                               |
| M 4                            | ID                                        | Brožek, Keys                                                      | The evaluation of leanness-fatness in man: norm and interrelationships                                    | British Journal of Nutrition                | 1951 | B                                               |
| M 5                            | ID                                        | Brožek, Keys                                                      | The evaluation of leanness-fatness in man: norm and interrelationships                                    | British Journal of Nutrition                | 1951 | B                                               |
| M 6                            | ID                                        | Lohman                                                            | Skinfolds and Body Density and Their Relation to Body Fatness: A Review                                   | Human Biology                               | 1981 | S                                               |
| M 7                            | ID                                        | Lohman                                                            | Skinfolds and Body Density and Their Relation to Body Fatness: A Review                                   | Human Biology                               | 1981 | B                                               |
| M 8                            | ID                                        | Cowgill                                                           | A formula for estimating the specific gravity of the human body with a consideration of its possible uses | Am J Clin Nutr                              | 1957 | S                                               |
| M 9                            | ID                                        | Brožek, Keys                                                      | The evaluation of leanness-fatness in man: norm and interrelationships                                    | British Journal of Nutrition                | 1951 | S                                               |
| M 10                           | ID                                        | Cowgill                                                           | A formula for estimating the specific gravity of the human body with a consideration of its possible uses | Am J Clin Nutr                              | 1957 | S                                               |
| M 11                           | ID                                        | Cowgill                                                           | A formula for estimating the specific gravity of the human body with a consideration of its possible uses | Am J Clin Nutr                              | 1957 | B                                               |
| M 12                           | ID                                        | Brožek, Keys                                                      | The evaluation of leanness-fatness in man: norm and interrelationships                                    | British Journal of Nutrition                | 1951 | B                                               |
| M 13                           | ID                                        | Cowgill                                                           | A formula for estimating the specific gravity of the human body with a consideration of its possible uses | Am J Clin Nutr                              | 1957 | B                                               |
| M 14                           | D                                         | Levitt, Heymsfield, Pierson, Shapses, Kral                        | Physiological models of body composition and human obesity                                                | Nutr Metab (Lond)                           | 2007 | /                                               |
| M 15                           | ID                                        | Sloan                                                             | Estimation of body fat in young men                                                                       | Journal of Applied Physiology               | 1967 | S                                               |
| M 16                           | ID                                        | Sloan                                                             | Estimation of body fat in young men                                                                       | Journal of Applied Physiology               | 1967 | B                                               |
| M 17                           | ID                                        | Katch, McArdle                                                    | Prediction of body density from simple anthropometric measurements in college-age men and women           | Hum Biol                                    | 1973 | S                                               |
| M 18                           | ID                                        | Katch, McArdle                                                    | Prediction of body density from simple anthropometric measurements in college-age men and women           | Hum Biol                                    | 1973 | B                                               |
| M 19                           | D                                         | Lean, Han, Deurenberg                                             | Predicting body composition by densitometry from simple anthropometric measurements                       | The American Journal of Clinical Nutrition  | 1996 | /                                               |
| M 20                           | ID                                        | Lean, Han, Deurenberg                                             | Predicting body composition by densitometry from simple anthropometric measurements                       | The American Journal of Clinical Nutrition  | 1996 | S                                               |
| M 21                           | ID                                        | Lean, Han, Deurenberg                                             | Predicting body composition by densitometry from simple anthropometric measurements                       | The American Journal of Clinical Nutrition  | 1996 | B                                               |
| M 22                           | D                                         | Lean, Han, Deurenberg                                             | Predicting body composition by densitometry from simple anthropometric measurements                       | The American Journal of Clinical Nutrition  | 1996 | /                                               |
| M 23                           | D                                         | Lean, Han, Deurenberg                                             | Predicting body composition by densitometry from simple anthropometric measurements                       | The American Journal of Clinical Nutrition  | 1996 | /                                               |
| M 24                           | ID                                        | Lean, Han, Deurenberg                                             | Predicting body composition by densitometry from simple anthropometric measurements                       | The American Journal of Clinical Nutrition  | 1996 | S                                               |
| M 25                           | D                                         | Chinn, Allen                                                      | Body fat in men from two skinfolds, weight, height, and age                                               | Rep. U.S. Army med. Res. Nutr. Lab. no. 248 | 1960 | /                                               |
| M 26                           | D                                         | Slaughter, Lohman, Boileau, Horswill, Stillman, van Loan, Bembien | Skinfold equations for estimation of body fatness in children and youth                                   | Human Biology                               | 1988 | /                                               |
| M 27                           | ID                                        | Lean, Han, Deurenberg                                             | Predicting body composition by densitometry from simple anthropometric measurements                       | The American Journal of Clinical Nutrition  | 1996 | B                                               |
| M 28                           | ID                                        | Lean, Han, Deurenberg                                             | Predicting body composition by densitometry from simple anthropometric measurements                       | The American Journal of Clinical Nutrition  | 1996 | S                                               |
| M 29                           | D                                         | Lean, Han, Deurenberg                                             | Predicting body composition by densitometry from simple anthropometric measurements                       | The American Journal of Clinical Nutrition  | 1996 | /                                               |
| M 30                           | ID                                        | Forsyth, Sinning                                                  | The anthropometric estimation of body density and lean body weight of male athletes                       | Med Sci Sports                              | 1973 | S                                               |

|      |    |                                                                                                                            |                                                                                                                                                      |                                            |      |   |
|------|----|----------------------------------------------------------------------------------------------------------------------------|------------------------------------------------------------------------------------------------------------------------------------------------------|--------------------------------------------|------|---|
| M 31 | ID | Lean, Han, Deurenberg                                                                                                      | Predicting body composition by densitometry from simple anthropometric measurements                                                                  | The American Journal of Clinical Nutrition | 1996 | B |
| M 32 | ID | Forsyth, Sinning                                                                                                           | The anthropometric estimation of body density and lean body weight of male athletes                                                                  | Med Sci Sports                             | 1973 | B |
| M 33 | ID | Forsyth, Sinning                                                                                                           | The anthropometric estimation of body density and lean body weight of male athletes                                                                  | Med Sci Sports                             | 1973 | S |
| M 34 | ID | Forsyth, Sinning                                                                                                           | The anthropometric estimation of body density and lean body weight of male athletes                                                                  | Med Sci Sports                             | 1973 | B |
| M 35 | D  | Al-Gindan, Hankey, Govan, Gallagher, Heymsfield, Lean                                                                      | Derivation and validation of simple anthropometric equations to predict adipose front thigh mass and total fat mass with MRI as the reference method | British Journal of Nutrition               | 2015 | / |
| M 36 | D  | Ross, Léger, Morris, de Guise, Guardo                                                                                      | Quantification of adipose front thigh mass by MRI: relationship with anthropometric variables                                                        | American Journal of Physiology             | 1992 | / |
| M 37 | D  | Garcia, Wagner, Hothorn, Koebnick, Zunft, Trippo                                                                           | Improved Prediction of Body Fat by Measuring Skinfold Thickness, Circumferences, and Bone Breadths                                                   | Obesity Research                           | 2005 | / |
| M 38 | D  | Slaughter, Lohman, Boileau, Horswill, Stillman, van Loan, Bembien                                                          | Skinfold equations for estimation of body fatness in children and youth                                                                              | Human Biology                              | 1988 | / |
| M 39 | ID | Lean, Han, Deurenberg                                                                                                      | Predicting body composition by densitometry from simple anthropometric measurements                                                                  | The American Journal of Clinical Nutrition | 1996 | S |
| M 40 | ID | Lean, Han, Deurenberg                                                                                                      | Predicting body composition by densitometry from simple anthropometric measurements                                                                  | The American Journal of Clinical Nutrition | 1996 | B |
| M 41 | D  | Al-Gindan, Hankey, Govan, Gallagher, Heymsfield, Lean                                                                      | Derivation and validation of simple anthropometric equations to predict adipose front thigh mass and total fat mass with MRI as the reference method | British Journal of Nutrition               | 2015 | / |
| M 42 | ID | Lean, Han, Deurenberg                                                                                                      | Predicting body composition by densitometry from simple anthropometric measurements                                                                  | The American Journal of Clinical Nutrition | 1996 | S |
| M 43 | D  | Lean, Han, Deurenberg                                                                                                      | Predicting body composition by densitometry from simple anthropometric measurements                                                                  | The American Journal of Clinical Nutrition | 1996 | / |
| M 44 | ID | Lean, Han, Deurenberg                                                                                                      | Predicting body composition by densitometry from simple anthropometric measurements                                                                  | The American Journal of Clinical Nutrition | 1996 | B |
| M 45 | D  | Lean, Han, Deurenberg                                                                                                      | Predicting body composition by densitometry from simple anthropometric measurements                                                                  | The American Journal of Clinical Nutrition | 1996 | / |
| M 46 | ID | Lean, Han, Deurenberg                                                                                                      | Predicting body composition by densitometry from simple anthropometric measurements                                                                  | The American Journal of Clinical Nutrition | 1996 | S |
| M 47 | ID | Lean, Han, Deurenberg                                                                                                      | Predicting body composition by densitometry from simple anthropometric measurements                                                                  | The American Journal of Clinical Nutrition | 1996 | B |
| M 48 | ID | Lean, Han, Deurenberg                                                                                                      | Predicting body composition by densitometry from simple anthropometric measurements                                                                  | The American Journal of Clinical Nutrition | 1996 | S |
| M 49 | D  | Lean, Han, Deurenberg                                                                                                      | Predicting body composition by densitometry from simple anthropometric measurements                                                                  | The American Journal of Clinical Nutrition | 1996 | / |
| M 50 | ID | Lean, Han, Deurenberg                                                                                                      | Predicting body composition by densitometry from simple anthropometric measurements                                                                  | The American Journal of Clinical Nutrition | 1996 | B |
| M 51 | ID | Durnin, Womersly                                                                                                           | Body fat assessed from total body density and its estimation from skinfold thickness: measurements on 481 men and women aged from 16 to 72 years     | British Journal of Nutrition               | 1974 | S |
| M 52 | ID | Durnin, Womersly                                                                                                           | Body fat assessed from total body density and its estimation from skinfold thickness: measurements on 481 men and women aged from 16 to 72 years     | British Journal of Nutrition               | 1974 | B |
| M 53 | D  | Deurenberg, Weststrate, Seidell                                                                                            | Body mass index as a measure of body fatness: age- and sex- specific prediction formulas                                                             | British Journal of Nutrition               | 1991 | / |
| M 54 | ID | Haisman                                                                                                                    | The assessment of body fat content in young men from measurements of body density and skinfold thickness                                             | Human Biology                              | 1970 | S |
| M 55 | ID | Haisman                                                                                                                    | The assessment of body fat content in young men from measurements of body density and skinfold thickness                                             | Human Biology                              | 1970 | B |
| M 56 | ID | Durnin, Rahaman                                                                                                            | The assessment of the amount of fat in the human body from measurements of skinfold thickness                                                        | British Journal of Nutrition               | 1967 | B |
| M 57 | ID | Durnin, Rahaman                                                                                                            | The assessment of the amount of fat in the human body from measurements of skinfold thickness                                                        | British Journal of Nutrition               | 1967 | S |
| M 58 | D  | Jackson, Stanforth, Gagnon, Rankinen, Leon, Rao, Skinner, Bouchard, Wilmore                                                | The effect of sex, age and race on estimating percentage body fat from body mass index: The Heritage Family Study                                    | International Journal of Obesity           | 2002 | / |
| M 59 | D  | Gómez-Ambrosi, Silva, Galofré, Escalada, Santos, Millán, Vila, Ibañez, Gil, Valenti, Rotellar, Ramírez, Salvador, Frühbeck | Body mass index classification misses subjects with increased cardiometabolic risk factors related to elevated adiposity                             | Int J Obes (Lond)                          | 2011 | / |
| M 60 | D  | Edwards, Whyte                                                                                                             | The simple measurement of obesity                                                                                                                    | Clin Sci                                   | 1962 | / |
| M 61 | ID | Lean, Han, Deurenberg                                                                                                      | Predicting body composition by densitometry from simple anthropometric measurements                                                                  | The American Journal of Clinical Nutrition | 1996 | B |
| M 62 | ID | Lean, Han, Deurenberg                                                                                                      | Predicting body composition by densitometry from simple anthropometric measurements                                                                  | The American Journal of Clinical Nutrition | 1996 | S |
| M 63 | D  | Peterson, Czerwinski, Siervogel                                                                                            | Development and validation of skinfold-thickness prediction equations with a 4-compartment model                                                     | The American Journal of Clinical Nutrition | 2003 | / |
| M 64 | D  | Lean, Han, Deurenberg                                                                                                      | Predicting body composition by densitometry from simple anthropometric measurements                                                                  | The American Journal of Clinical Nutrition | 1996 | / |
| M 65 | D  | Edwards, Whyte                                                                                                             | The simple measurement of obesity                                                                                                                    | Clin Sci                                   | 1962 | / |
| M 66 | ID | Sloan                                                                                                                      | Estimation of body fat in young men                                                                                                                  | Journal of Applied Physiology              | 1967 | B |
| M 67 | ID | Sloan                                                                                                                      | Estimation of body fat in young men                                                                                                                  | Journal of Applied Physiology              | 1967 | S |

\* S - Siri, W.E. In: J. Brozek & A. Hanschel (Eds.), Techniques for measuring body composition (pp. 223-244). Washington, DC: Nat Acad Sci. 1961  
B - Brożek, Grande, Anderson, Keys. Ann N Y Acad Sci. 110: 113-40. 1963  
/- Direct equation for BF calculation.
